# Supplementary material
Source: publisher figshare collection journal article supplement (https://acs.figshare.com/ndownloader/files/4181740)
Supplement: Supplementary file 1 [file 4181740]

## 1 SUPPORTING INFORMATION

### 2 *Description and assessment of Langmuir model for combined fitting of ITC and* 3 *ellipsometry data*

4 Elucidation of molecular details of interaction in biological systems relies on the assumption that  
5 the applied model correctly describes the mechanism of the studied process. We use Langmuir  
6 model for fitting ellipsometry and isothermal titration calorimetry (ITC) data and investigate  
7 applicability of this approach for studying binding of model peptidomimetics to negatively charged  
8 lipid membranes.

#### 9 *Model description*

10 The analysis of the binding/adsorption data was performed using the classic Langmuir model,  
11 described by an equilibrium reaction:

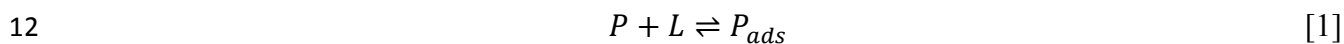

13 where  $P$  and  $P_{ads}$  designate the peptidomimetic in solution and adsorbed on the surface, whereas  $L$   
14 represents free adsorption sites on the lipid bilayer. The assumptions of this model include: a) all  
15 adsorption sites are equivalent; b) the adsorbed molecules do not interact; c) all adsorption events  
16 occur through the same mechanism; d) at maximum adsorption, only a monolayer is formed.

17 The equilibrium constant for this reaction is:

$$18 \qquad K = \frac{P_{ads}}{[P]_f \cdot L_f} \qquad [2]$$

19 where  $[P]_f$  is the molar concentration of free (non-bound) peptidomimetic,  $L_f$  is the number of free  
20 adsorption sites and  $P_{ads}$  is the amount of adsorbed molecules (all of which are unknown).

21 Introducing the degree of saturation,  $\theta$ , defined as the ratio between the occupied ( $P_{ads}$ ) and the total  
 22 amount ( $L_t$ ) of adsorption sites, we can write:

$$23 \quad \theta = \frac{P_{ads}}{L_t} \quad [3]$$

24 then

$$25 \quad \begin{cases} P_{ads} = \theta \cdot L_t \\ L_f = (1 - \theta) \cdot L_t \end{cases} \quad [4]$$

26 while

$$27 \quad [P]_f = C - \frac{P_{ads}}{V} = C - \frac{\theta \cdot L_t}{V} \quad [5]$$

28 Here  $C$  is the total concentration of the peptidomimetic and  $V$  is the volume of the reaction cell  
 29 (approximately 5 mL). Substituting these into the equation for  $K$ , we obtain:

$$30 \quad K = \frac{\theta}{1-\theta} \cdot \frac{V}{CV - \theta L_t} = \frac{\theta}{1-\theta} \cdot \frac{1}{C - \theta L_t/V} \quad [6]$$

31 Assuming that the bulk concentration of the peptidomimetic,  $C$ , is large compared to the amount  
 32 adsorbed on the available surface,  $\theta L_t/V$ , we can write:

$$33 \quad \theta L_t/V \ll C \quad [7]$$

34 Hence the expression for the equilibrium constant can be approximated by:

$$35 \quad K \approx \frac{\theta}{1-\theta} \cdot \frac{1}{C} \quad [8]$$

36 and thus

$$37 \quad \theta = \frac{K \cdot C}{K \cdot C + 1} \quad [9]$$

38 The above assumption is necessary for the completion of the ellipsometry data treatment. However,  
39 as shown below, this correction is small ( $< 1\%$ ), compared to the uncertainties in determination of  
40 concentrations of the reactants. The ellipsometry experiments provide values for the parameter  $\Gamma_p$ ,  
41 which is the density of the peptidomimetic adsorbed at the lipid bilayer in  $\text{nmol/m}^2$ . Using  
42 parameter  $\Gamma_t$ , the surface density of the total number of adsorption sites, we can eliminate  $\theta$ :

43 
$$\theta = \frac{\Gamma_p}{\Gamma_t} \quad [10]$$

44 Thus experimental ellipsometry data can be expressed as

45 
$$\Gamma_p = \Gamma_t \frac{K \cdot C}{K \cdot C + 1} \quad [11]$$

46 and fitted by floating the parameters  $\Gamma_t$  and  $K$ .

47 Each ellipsometry experiment contains 4 data points. To increase the reliability of the least-squares  
48 analysis the two duplicate experiments were fitted together (increasing the number of data points to  
49 8), using the same values for  $\Gamma_t$  and  $K$ . Two extra parameters,<sup>i</sup> describing the initial offset of optical  
50 polarization not related to the binding process were introduced to improve the quality of the fit. The  
51 standard deviations were obtained from 95 % confidence intervals of the fit, following the protocol  
52 of Kemmer & Keller<sup>[1]</sup>.

53

---

<sup>i</sup> These two parameters do not have any thermodynamic significance and reflect the fact that even a minute concentration of peptidomimetic influences the structure of a lipid bilayer, shifting the whole data set up or down in  $\Gamma$  values, compared to a pure lipid. The offset parameter is essentially a transfer of the binding curve along the y-axis.

## 54 *Analysis of the ITC data*

55 The major advantage of calorimetry is the possibility to directly access the enthalpy of  
 56 intermolecular interactions,  $\Delta H$ . Using equation [10], we can express  $\theta$  in terms of the adsorbed  
 57 peptidomimetic,  $X$  (in nanomoles), which yields:

$$58 \quad \theta = \frac{X}{L_t} = \frac{X}{\gamma S} \quad [12]$$

59 Here  $L_t$  is substituted by  $\gamma S$ , since the total number of peptidomimetic binding sites is proportional  
 60 to the total area of the membrane surface,  $S$ . The proportionality coefficient,  $\gamma$ , has the dimension of  
 61  $\text{mol/m}^2$  (or  $\text{nmol/m}^2$ ), which is the surface density of the adsorbed peptidomimetic at saturation.  
 62 This parameter can be compared directly to the one obtained from the fitting of ellipsometry data,  $\Gamma_t$ .  
 63 Then  $K$  becomes:

$$64 \quad K = \frac{X}{(C - X/V_{cell}) \cdot (\gamma S - X)} \quad [13]$$

65 Rearrangement of the above leads to the quadratic equation

$$66 \quad K \cdot X^2 - X \cdot (V_{cell} + K \cdot (CV_{cell} + \gamma S)) + CK\gamma SV_{cell} = 0 \quad [14]$$

67 which can be solved through the commonly used method for finding the discriminant,  $\Delta$ , and then  
 68 one of the roots,  $X$ :

$$69 \quad \Delta = (V_{cell} + K \cdot (CV_{cell} + \gamma S))^2 - 4 \cdot K^2 C \gamma S V_{cell} \quad [15]$$

$$70 \quad X_{1,2} = \frac{V_{cell} + K \cdot (CV_{cell} + \gamma S) \pm \sqrt{\Delta}}{2K} \quad [16]$$

71 In the formulas above, the known parameters are the cell volume,  $V_{cell} = 1.0 \text{ mL}$ , and the total  
 72 concentration of the peptidomimetic,  $C$ . The total adsorption area,  $S$ , calculated from the molar  
 73 concentration of the lipids,  $[l]$ , and the surface area of a liposome,  $A$ , as:

$$S = n \cdot A \cdot V_{cell} \quad [17]$$

$$n = \frac{\text{number of LUVs}}{\text{Liter}} = \frac{[l] \cdot N_A}{\text{number of lipids per LUV}} = \frac{[l] \cdot N_A \cdot A}{2a} \quad [18]$$

$$A = \pi d^2 \quad [19]$$

Here  $a$  is the surface area of a POPC molecule in a lipid bilayer and is equal to  $68 \text{ \AA}^2$ ,<sup>[2]</sup>  $d = 100 \text{ nm}$  is the average diameter of an LUV and  $N_A$  is the Avogadro constant.

The total heat measured by ITC,  $Q$ , is proportional to the amount (in moles) of adsorbed peptidomimetic:

$$Q = X \cdot \Delta H \quad [20]$$

and the heat produced by the  $i$ -th injection,  $q_i$ , can be expressed as:

$$q_i = Q_i - Q_{i-1} = \Delta H \cdot (X_i - X_{i-1}) \quad [21]$$

During the fitting procedure the experimental heats are compared to the calculated ones. The best fit is achieved by minimizing the variance upon changing the parameters  $\Delta H$ ,  $\gamma$ ,  $K$  and  $q_{offset}^{ii}$ .

### ***Validation of the Langmuir adsorption model***

Two fundamental requirements for the Langmuir approach are i) the monolayer adsorption and ii) the absence of interaction between the neighboring peptidomimetics. This approximation can be evaluated by calculating the surface density of the peptidomimetics at saturation,  $\Gamma_s$ . For example, the estimated surface area per H-(hArg-Bn)<sub>6</sub>-NH<sub>2</sub> is  $\sim 20 \text{ nm}^2$  (at  $37^\circ \text{C}$ ), obtained by dividing  $85 \text{ nm/m}^2$  (Table 1 in the main text) by Avogadro constant. This value, which is an order of magnitude

---

<sup>ii</sup> This parameter describes the residual non-zero heat associated with the dilution of titrant after the complete saturation of the binding sites.

larger than the molecular size of the peptidomimetic can be converted into the average distance between two neighboring molecules, amounting to  $\sim 44$  Å. The long average distance between two bound molecules precludes their interaction through hydrogen bonding or van der Waals forces. Furthermore, calculation of the Debye length in a 150 mM KCl solution at 37 °C according to Eq. [22].

$$\kappa^{-1} = \sqrt{\frac{\epsilon_r \epsilon_0 k_B T}{2 N_A e^2 I}} \quad [22]$$

using the table values for permittivity of free space,  $\epsilon_0$ , the dielectric constant of water,  $\epsilon_r$ , Boltzmann constant,  $k_B$ , Avogadro number,  $N_A$ , and elementary charge,  $e$ , gives  $\sim 8$  Å. The short Debye length implies that involvement of long-range electrostatic forces into peptidomimetic-peptidomimetic interaction is unlikely. Together, this demonstrates the absence of both long-range and short-range interactions between peptidomimetics and thus fulfills two requirements of the Langmuir model: 1) the absence of interaction between the adsorbed molecules and 2) monolayer adsorption.

## REFERENCES

1. Kemmer, G. and Keller, S. *Nat. Protoc.* **2010**, 5, 267.
2. Kucerka, N.; Tristram-Nagle, S.; Nagle, J.F. *J. Membr. Biol.* **2005**, 208, 193.
